# Supplementary material for: Raters Interpret Positively and Negatively Worded Items Similarly in a Quality of Life Instrument for Children: Kid-KINDL
Source: PubMed Central journal article supplement — Inquiry. 2017 Mar 15;54:0046958017696724. doi: 10.1177/0046958017696724 (PMC5798710; doi:10.1177/0046958017696724), 2017-03-15
Supplement: MEISuppTable12-15-16.pdf [file MEISuppTable12-15-16.pdf]

Table S1. Items of the Kid-KINDL

|                                      |                                                   |
|--------------------------------------|---------------------------------------------------|
| PHYSICAL WELL-BEING                  | FAMILY                                            |
| <b>P1 ...felt ill</b>                | Fa1 ...got on well with my parents                |
| <b>P2 ...headache or stomachache</b> | Fa2 ...felt fine at home                          |
| <b>P3 ...tired and sleepy</b>        | <b>Fa3 ...quarreled at home</b>                   |
| P4 ...strong and full of energy      | <b>Fa4 ...stopped from doing certain things</b>   |
| EMOTIONAL WELL-BEING                 | FRIENDS                                           |
| E1 ...had fun and laughed a lot      | Fr1 ...played with friends                        |
| <b>E2 ...bored</b>                   | Fr2 ...other kids liked me                        |
| <b>E3 ...felt alone</b>              | Fr3 ...got along well with my friends             |
| <b>E4 ...scared</b>                  | <b>Fr4 ...felt different from other children*</b> |
| SELF-ESTEEM                          | SCHOOL                                            |
| SE1 ...proud of myself               | S1 ...doing my school work was easy               |
| SE2 ...felt on top of the world      | S2 ...enjoyed my lessons                          |
| SE3 ...felt pleased with myself      | <b>S3 ...worried about my future</b>              |
| SE4 ...had lots of good ideas        | <b>S4 ...was afraid of bad marks or grades</b>    |

Negatively worded items have been reverse-coded and reported in **bold** font.

\* Item Fr4 was not analyzed in this current study.

Table S2. Baseline factor loadings<sup>a</sup> on Chinese Kid-KINDL for four groups

| Item #     | Unstandardized factor loadings (Standard error)/Standardized factor loadings |                    |                     |                    |
|------------|------------------------------------------------------------------------------|--------------------|---------------------|--------------------|
|            | Boys (n=208)                                                                 | Girls (n=235)      | Parents (n=241)     | Children (n=443)   |
| <b>P1</b>  | 1.000(--)/0.458                                                              | 1.000(--)/0.464    | 1.000(--)/0.810     | 1.000(--)/0.472    |
| <b>P2</b>  | 1.147(0.253)/0.544                                                           | 1.381(0.264)/0.634 | 1.009(0.094)/0.772  | 1.290(0.180)/0.615 |
| <b>P3</b>  | 1.922(0.401)/0.714                                                           | 1.667(0.320)/0.626 | 0.865(0.088)/0.664  | 1.746(0.238)/0.667 |
| P4         | 0.624(0.293)/0.190                                                           | 1.323(0.320)/0.401 | 0.438(0.117)/0.258  | 0.953(0.207)/0.296 |
| E1         | 1.000(--)/0.208                                                              | 1.000(--)/0.456    | 1.000(--)/0.460     | 1.000(--)/0.328    |
| <b>E2</b>  | 2.729(1.124)/0.578                                                           | 1.534(0.237)/0.741 | 0.732(0.219)/0.322  | 1.882(0.312)/0.645 |
| <b>E3</b>  | 1.947(0.845)/0.479                                                           | 1.609(0.243)/0.793 | 1.522(0.313)/0.661  | 2.095(0.335)/0.780 |
| <b>E4</b>  | 1.274(0.625)/0.321                                                           | 1.201(0.202)/0.580 | 1.192(0.256)/0.543  | 1.665(0.276)/0.618 |
| SE1        | 1.000(--)/0.620                                                              | 1.000(--)/0.712    | 1.000(--)/0.240     | 1.000(--)/0.620    |
| SE2        | 1.360(0.143)/0.859                                                           | 1.029(0.093)/0.733 | 2.481(0.891)/0.605  | 1.253(0.099)/0.784 |
| SE3        | 1.282(0.134)/0.790                                                           | 1.004(0.089)/0.732 | 1.717(0.587)/0.473  | 1.214(0.092)/0.761 |
| SE4        | 0.792(0.115)/0.522                                                           | 0.557(0.081)/0.453 | 1.284(0.479)/0.324  | 0.648(0.074)/0.442 |
| Fa1        | 1.000(--)/0.325                                                              | 1.000(--)/0.744    | 1.000(--)/0.693     | 1.000(--)/0.616    |
| Fa2        | 0.507(0.269)/0.161                                                           | 0.996(0.170)/0.598 | 1.055(0.119)/0.777  | 0.872(0.136)/0.483 |
| <b>Fa3</b> | 1.944(0.547)/0.626                                                           | 0.569(0.141)/0.345 | 0.600(0.109)/0.428  | 0.725(0.138)/0.406 |
| <b>Fa4</b> | 2.080(0.590)/0.541                                                           | 0.404(0.153)/0.210 | 0.485(0.131)/0.278  | 0.681(0.151)/0.317 |
| Fr1        | 1.000(--)/0.457                                                              | 1.000(--)/0.429    | 1.000(--)/0.403     | 1.000(--)/0.445    |
| Fr2        | 1.454(0.270)/0.683                                                           | 1.476(0.258)/0.637 | 1.075(0.185)/0.494  | 1.330(0.182)/0.601 |
| Fr3        | 1.147(0.214)/0.550                                                           | 1.315(0.231)/0.644 | 1.797(0.358)/0.870  | 1.269(0.171)/0.618 |
| S1         | 1.000(--)/0.215                                                              | 1.000(--)/0.641    | 1.000(--)/0.897     | 1.000(--)/0.584    |
| S2         | 1.130(0.449)/0.215                                                           | 0.940(0.158)/0.535 | 0.693(0.119)/0.615  | 0.965(0.160)/0.498 |
| <b>S3</b>  | 2.713(0.896)/0.480                                                           | 0.503(0.160)/0.262 | 0.103(0.085)/0.084* | 0.469(0.152)/0.222 |
| <b>S4</b>  | 5.735(2.102)/0.919                                                           | 0.548(0.167)/0.276 | 0.342(0.097)/0.263  | 0.634(0.170)/0.279 |

<sup>a</sup> Based on correlated traits and uncorrelated methods (CTUM) framework without any constraints.

\* p = 0.19; all other p < 0.05

Negatively worded items are in **bold** font.

Table S3. Fit indices of baseline model<sup>a</sup>

|           | Gender group    |                  |            | Rater group        |                                  |            | Rater group <sup>b</sup> |                                  |            |
|-----------|-----------------|------------------|------------|--------------------|----------------------------------|------------|--------------------------|----------------------------------|------------|
|           | Boys<br>(n=208) | Girls<br>(n=235) | Configural | Parents<br>(n=241) | Children<br>(n=443) <sup>c</sup> | Configural | Mothers<br>(n=176)       | Children<br>(n=443) <sup>c</sup> | Configural |
| $\chi^2$  | 306.078*        | 316.354*         | 622.433*   | 288.466*           | 375.337*                         | 663.802*   | 278.503*                 | 375.337*                         | 653.840*   |
| <i>df</i> | 192             | 192              | 384        | 192                | 192                              | 384        | 192                      | 192                              | 384        |
| GFI       | 0.894           | 0.900            | 0.900      | 0.908              | 0.934                            | 0.934      | 0.882                    | 0.934                            | 0.934      |
| NNFI      | 0.948           | 0.965            | 0.959      | 0.970              | 0.968                            | 0.969      | 0.965                    | 0.968                            | 0.967      |
| CFI       | 0.960           | 0.974            | 0.969      | 0.977              | 0.976                            | 0.976      | 0.974                    | 0.976                            | 0.975      |
| RMSEA     | 0.0476          | 0.0491           | 0.0484     | 0.0438             | 0.0447                           | 0.0444     | 0.0478                   | 0.0447                           | 0.0456     |
| SRMR      | 0.0609          | 0.0547           | 0.0547     | 0.0535             | 0.0452                           | 0.0452     | 0.0639                   | 0.0452                           | 0.0452     |

<sup>a</sup>Based on correlated traits and uncorrelated methods (CTUM) framework without any constraints.

<sup>b</sup>Parent-proxy using mothers' reports only.

<sup>c</sup>The results were the same because they were the same sample.

GFI=goodness of fit index; NNFI=non-normed fit index; CFI=comparable fit index; RMSEA= root mean square error of approximation;

SRMR=standardized root mean square residual.
